# Supplementary material for: Lewis acid capping of a uranium(v) nitride via a uranium(iii) azide molecular square
Source: Royal Society of Chemistry journal article supplement (doi:10.1039/d0cc01356k), 2020-01-01
Supplement: d0cc01356k1.pdf [file d0cc01356k1.pdf]

***Lewis Acid Capping of a Uranium(V) Nitride via a Uranium(III) Azide Molecular Square***

Michael A. Boreen,<sup>a,b</sup> Guodong Rao,<sup>c</sup> David Villarreal,<sup>c</sup> Fabian A. Watt,<sup>d</sup> R. David Britt,<sup>c</sup>  
Stephan Hohloch,<sup>e</sup> and John Arnold<sup>a,b,\*</sup>

<sup>a</sup>*Department of Chemistry, University of California, Berkeley, California 94720, USA*

<sup>b</sup>*Chemical Sciences Division, Lawrence Berkeley National Laboratory, Berkeley, California  
94720, USA*

<sup>c</sup>*Department of Chemistry, University of California, Davis, California 95616, USA*

<sup>d</sup>*University of Paderborn, Warburger Straße 100, 33098 Paderborn, Germany*

<sup>e</sup>*Leopold-Franzens-University Innsbruck, Faculty of Chemistry and Pharmacy, Institute of  
General, Inorganic and Theoretical Chemistry, Innrain 80-82, 6020 Innsbruck, Austria*

\*Email: [arnold@berkeley.edu](mailto:arnold@berkeley.edu), [stephan.hohloch@uibk.ac.at](mailto:stephan.hohloch@uibk.ac.at)

**Supporting Information**

|                         |        |
|-------------------------|--------|
| Experimental Procedures | S2–S4  |
| Scheme S1               | S4     |
| NMR Spectroscopy        | S5–S7  |
| X-ray Crystallography   | S8–S13 |
| EPR Spectroscopy        | S14    |
| References              | S15    |

## Experimental Procedures

*General Considerations:* Unless otherwise noted, all reactions were performed using standard Schlenk line techniques under an atmosphere of nitrogen or argon or in an MBraun inert atmosphere glove box under an atmosphere of nitrogen. Glassware and Celite® were stored in an oven at *ca.* 150 °C for at least 3 h prior to use. Molecular sieves (4 Å) were activated by heating to 200 °C overnight under vacuum prior to storage in a glove box. NMR spectra were recorded at room temperature unless noted otherwise on Bruker AV-300, AVB-400, AVQ-400, DRX-500, AV-500, or AV-600 spectrometers. <sup>13</sup>C NMR chemical shifts (δ) are given relative to residual solvent peaks and are recorded in units of parts per million (ppm). <sup>11</sup>B NMR chemical shifts (δ) were referenced to an external standard (BF<sub>3</sub>·OEt<sub>2</sub>, δ = 0). <sup>19</sup>F NMR chemical shifts (δ) are reported in ppm and referenced to an external standard (CFCl<sub>3</sub> in CDCl<sub>3</sub>). FT-IR samples were prepared as Nujol mulls pressed between KBr plates, with data collected with a Nicolet iS10 FT-IR spectrometer. Melting points were determined using sealed capillaries prepared under nitrogen on an OptiMelt automated melting point system. Elemental analyses were determined at the Microanalytical Facility at the College of Chemistry, University of California, Berkeley. Photolysis experiments were conducted in a Rayonet reactor, model RPR-100, centered at 253 nm.

*Materials:* Diethyl ether, *n*-hexane, *n*-pentane, THF, 1,2-dimethoxyethane (DME), benzene, and toluene were purified by passage through columns of activated alumina and degassed by sparging with nitrogen. C<sub>6</sub>D<sub>6</sub>, and pyridine-d<sub>5</sub> were vacuum-transferred from flasks containing sodium/benzophenone (C<sub>6</sub>D<sub>6</sub>) or calcium hydride (pyridine-d<sub>5</sub>), degassed with three freeze-pump-thaw cycles, and stored over molecular sieves. (Cp<sup>iPr4</sup>)<sub>2</sub>UI,<sup>1</sup> [(Cp<sup>iPr4</sup>)<sub>2</sub>U][B(C<sub>6</sub>F<sub>5</sub>)<sub>4</sub>],<sup>1</sup> and B(C<sub>6</sub>F<sub>5</sub>)<sub>3</sub>,<sup>2</sup> were synthesized according to literature procedures. All other chemicals were purchased from commercial sources and used as received.

### Synthesis of [(Cp<sup>iPr4</sup>)<sub>2</sub>U(μ-η<sup>1</sup>:η<sup>1</sup>-N<sub>3</sub>)]<sub>4</sub> (**1**)

THF (4 mL) was added to a mixture of (Cp<sup>iPr4</sup>)<sub>2</sub>UI (95 mg, 0.11 mmol, 1.0 equiv) and NaN<sub>3</sub> (7.7 mg, 0.12 mmol, 1.0 equiv), and the resulting green suspension was stirred in the dark for 18 h at room temperature. Volatiles were removed *in vacuo*, and the product was extracted into 6 mL of hexane (added quickly to ensure the product did not begin crystallizing in a smaller volume of solvent), filtered through Celite, concentrated to a volume of 1 mL, and allowed to crystallize at room temperature overnight. The product was isolated as green crystals after washing with 1 mL of pentane and drying *in vacuo* (70 mg, 0.023 mmol, 82% yield). X-ray quality crystals of **1** were grown from pentane at room temperature. Note that while the crude material could be extracted into hydrocarbon or ethereal solvents, the crystalline product formed upon filtration and concentration were subsequently not soluble in any solvents tested, including hexane, toluene, THF, DME, and pyridine. As such, X-ray quality crystals of **1** were formed by recrystallization of the crude material as opposed to isolated product. Mp *ca.* 134 °C (decomp.); IR: 2100 (ν(N<sub>3</sub>), vs), 1364 (m), 1302 (m), 1274 (w), 1188 (w), 1177 (m), 1146 (m), 1103 (m), 1061 (w), 983 (m), 919

(w), 794 (w), 779 (m), 723 (m) 670 (w), 632 (w), 616 (w), 602 (w)  $\text{cm}^{-1}$ . Anal. Calcd. (%) for  $\text{C}_{136}\text{H}_{232}\text{N}_{12}\text{U}_4$  (**1**): C, 54.68; H, 7.83; N, 5.63. Found: C, 53.99; H, 7.60; N, 5.39.

### Synthesis of $(\text{Cp}^{\text{iPr}_4})_2\text{U}(\mu\text{-N})\text{B}(\text{C}_6\text{F}_5)_3$ (**2**)

Benzene (2 mL) was added to a mixture of **1** (99 mg, 0.033 mmol, 1.0 equiv) and  $\text{B}(\text{C}_6\text{F}_5)_3$  (68 mg, 0.13 mmol, 4.0 equiv), and the resulting suspension was stirred in the dark for 45 min at room temperature. During this time, the reaction mixture changed from a green suspension to a clear, dark red-orange solution. Volatiles were removed by lyophilization (to ensure the product did not begin crystallizing in a small volume of solvent), and the product was extracted into 3 mL of toluene, filtered through Celite, concentrated, and cooled to  $-40^\circ\text{C}$ . The product was isolated as dark red crystals after washing with 1 mL of hexane and drying *in vacuo*. Concentration and cooling of the supernatant yielded a second crop of product in a similar fashion (104 mg combined, 0.085 mmol, 64% yield). X-ray quality crystals of **2** were grown from toluene at  $-40^\circ\text{C}$ . Mp ca.  $154^\circ\text{C}$  (decomp.). Due to very low solubility in hydrocarbon solvents and instability in more coordinating solvents such as THF or pyridine, it was not possible to acquire adequate NMR spectroscopic data for **2**. IR: 1640 (m), 1515 (s), 1305 (w), 1274 (m), 1180 (w), 1147 (w), 1086 (s), 973 (s), 951 (s), 839 (w), 805 (w), 748 (w), 771 (w), 762 (w), 744 (w), 734 (m), 727 (m), 696 (w), 681 (m), 657 (w), 624 (w), 601 (w)  $\text{cm}^{-1}$ . Anal. Calcd. (%) for  $\text{C}_{52}\text{H}_{58}\text{BF}_{15}\text{NU}$  (**2**): C, 50.74; H, 4.75; N, 1.14. Found: C, 51.14; H, 4.56; N, 1.24.

### Synthesis of $[(\text{C}_6\text{F}_5)_3\text{B}(\mu_3\text{-}\eta^1:\eta^1:\eta^1\text{-N}_3)\text{Na}(\text{OEt}_2)_2]_2$ (**3**)

Based on the reported synthesis of  $[\text{N}(\text{nBu})_4][\{(\text{C}_6\text{F}_5)_3\text{BN}\}\text{U}\{\text{N}(\text{iBu})(3,5\text{-Me}_2\text{C}_6\text{H}_3)\}_3]_3$ ,<sup>3</sup> we sought to determine if we could prepare **2** by reaction of an azidoborate salt with a uranium(III) precursor. The reaction of a 1:1 mixture of  $\text{NaN}_3$  and  $\text{B}(\text{C}_6\text{F}_5)_3$  in benzene, followed by crystallization from diethyl ether, yielded the novel azidoborate species  $[(\text{C}_6\text{F}_5)_3\text{B}(\mu_3\text{-}\eta^1:\eta^1:\eta^1\text{-N}_3)\text{Na}(\text{OEt}_2)_2]_2$  (**3**) (See Scheme S1 and Figure S5; selected structural metrics are shown in Table S3). Reactions between **3** and either  $(\text{Cp}^{\text{iPr}_4})_2\text{UI}$  or  $[(\text{Cp}^{\text{iPr}_4})_2\text{U}][\text{B}(\text{C}_6\text{F}_5)_4]_1$  yielded intractable mixtures.

Benzene (2 mL) was added to a mixture of  $\text{B}(\text{C}_6\text{F}_5)_3$  (108 mg, 0.21 mmol, 1.0 equiv) and  $\text{NaN}_3$  (15 mg, 0.22 mmol, 1.1 equiv), and the resulting colorless suspension was stirred for 24 h at room temperature. Volatiles were removed from the colorless, cloudy mixture *in vacuo*, and the product was extracted with 2 mL of ether, filtered through Celite, concentrated, and cooled to  $-40^\circ\text{C}$ . The product was isolated as colorless crystals after washing with 1 mL of hexane and drying *in vacuo* (82 mg, 0.11 mmol, 54% yield). X-ray quality crystals of **3** were grown from ether at  $-40^\circ\text{C}$ . Mp ca.  $137^\circ\text{C}$  (decomp.);  $^{11}\text{B}$  NMR (193 MHz,  $(\text{CH}_3\text{CH}_2)_2\text{O}$ ):  $\delta$   $-6.99$  (s);  $^{13}\text{C}$  (151 MHz,  $(\text{CH}_3\text{CH}_2)_2\text{O}$ ):  $\delta$  148.13 (m,  $^1J_{\text{C,F}} = 243$  Hz), 139.12 (m,  $^1J_{\text{C,F}} = 248$  Hz), 136.74 (m,  $^1J_{\text{C,F}} = 244$  Hz), 120.10 (broad, *ipso*- $\text{C}_6\text{F}_5$ );  $^{19}\text{F}$  NMR (376 MHz,  $(\text{CH}_3\text{CH}_2)_2\text{O}$ ):  $\delta$   $-133.87$  (dd,  $^3J_{\text{F,F}} = 23.8$ ,  $^4J_{\text{F,F}} = 8.6$  Hz, 12F, *o*-F),  $-160.29$  (t,  $^3J_{\text{F,F}} = 20.0$  Hz, 6F, *p*-F),  $-165.32$  (m, 12F, *m*-F); IR: 2148 ( $\nu(\text{N}_3)$ , vs), 1645 (s), 1601 (w) 1518 (s), 1331 (m), 1301 (w), 1281 (s), 1183 (w), 1153 (w), 1093 (s), 1067 (m), 1014 (w), 974 (s), 914 (w), 884 (w), 867 (m), 835 (w), 801 (m), 769 (m), 746 (m),

733 (w), 692 (s), 670 (m), 652 (w), 618 (m), 604 (w)  $\text{cm}^{-1}$ . Anal. Calcd. (%) for  $\text{C}_{52}\text{H}_{40}\text{B}_2\text{F}_{30}\text{N}_6\text{Na}_2\text{O}_4$  (**3**): C, 43.06; H, 2.78; N, 5.79. Found: C, 42.91; H, 2.89; N, 6.24.

**Scheme S1.** Synthesis of  $[(\text{C}_6\text{F}_5)_3\text{B}(\mu_3\text{-}\eta^1:\eta^1\text{-N}_3)\text{Na}(\text{OEt}_2)_2]_2$  (**3**)

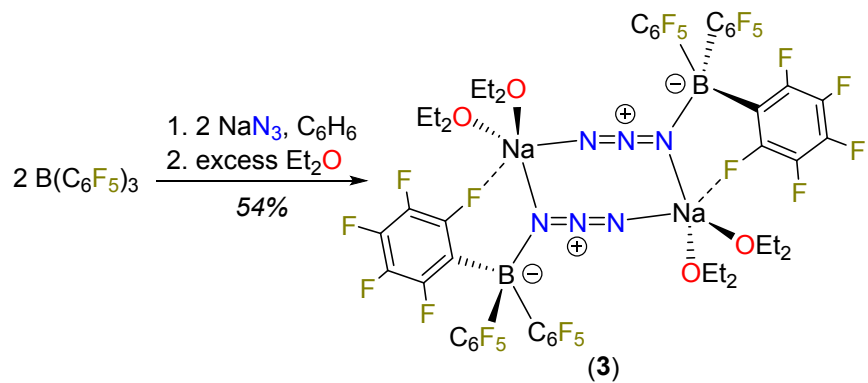

## NMR Spectroscopy

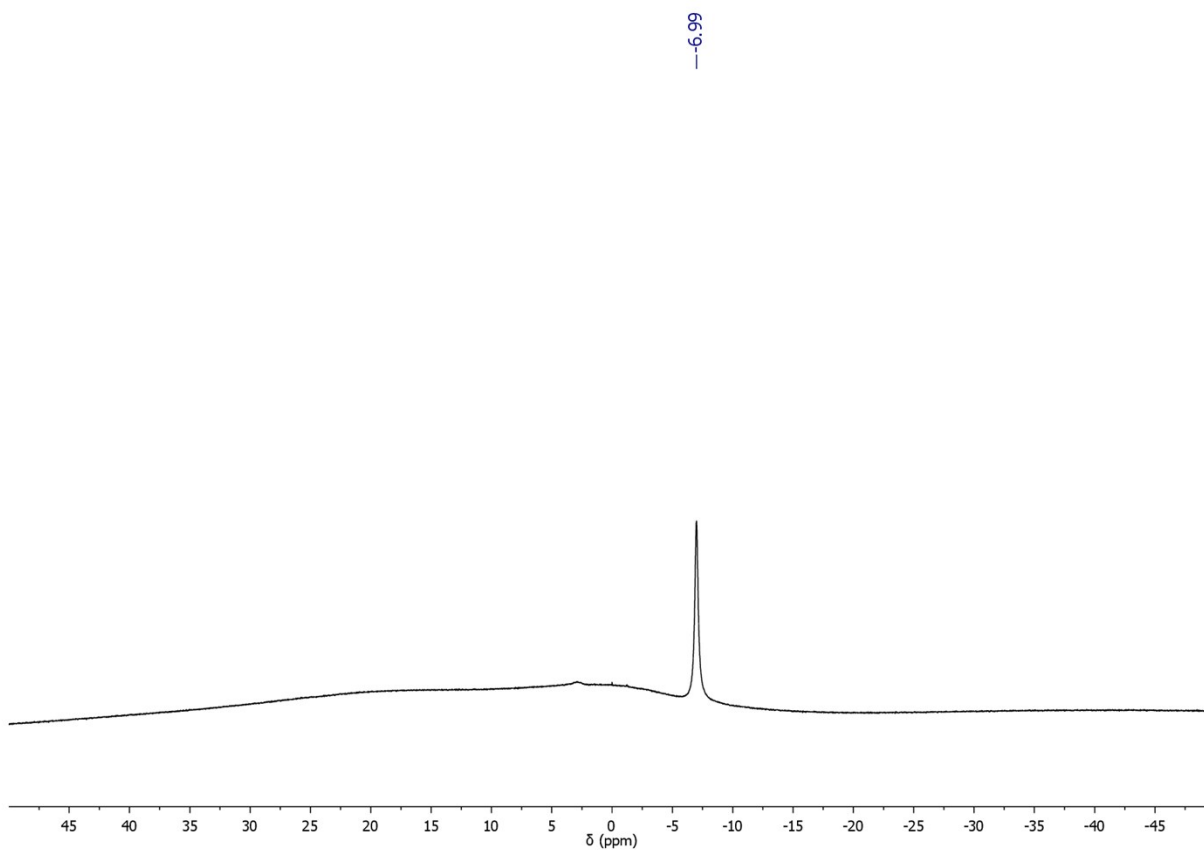

**Figure S1.** Room temperature  $^{11}\text{B}$  NMR spectrum of  $[(\text{C}_6\text{F}_5)_3\text{B}(\mu_3\text{-}\eta^1\text{:}\eta^1\text{:}\eta^1\text{-N}_3)\text{Na}(\text{OEt}_2)_2]_2$  (**3**) in  $(\text{CH}_3\text{CH}_2)_2\text{O}$ . The broad resonance centered at about  $\delta = 10$  ppm originates from borosilicate glass in the sample tube and spectrometer probe.

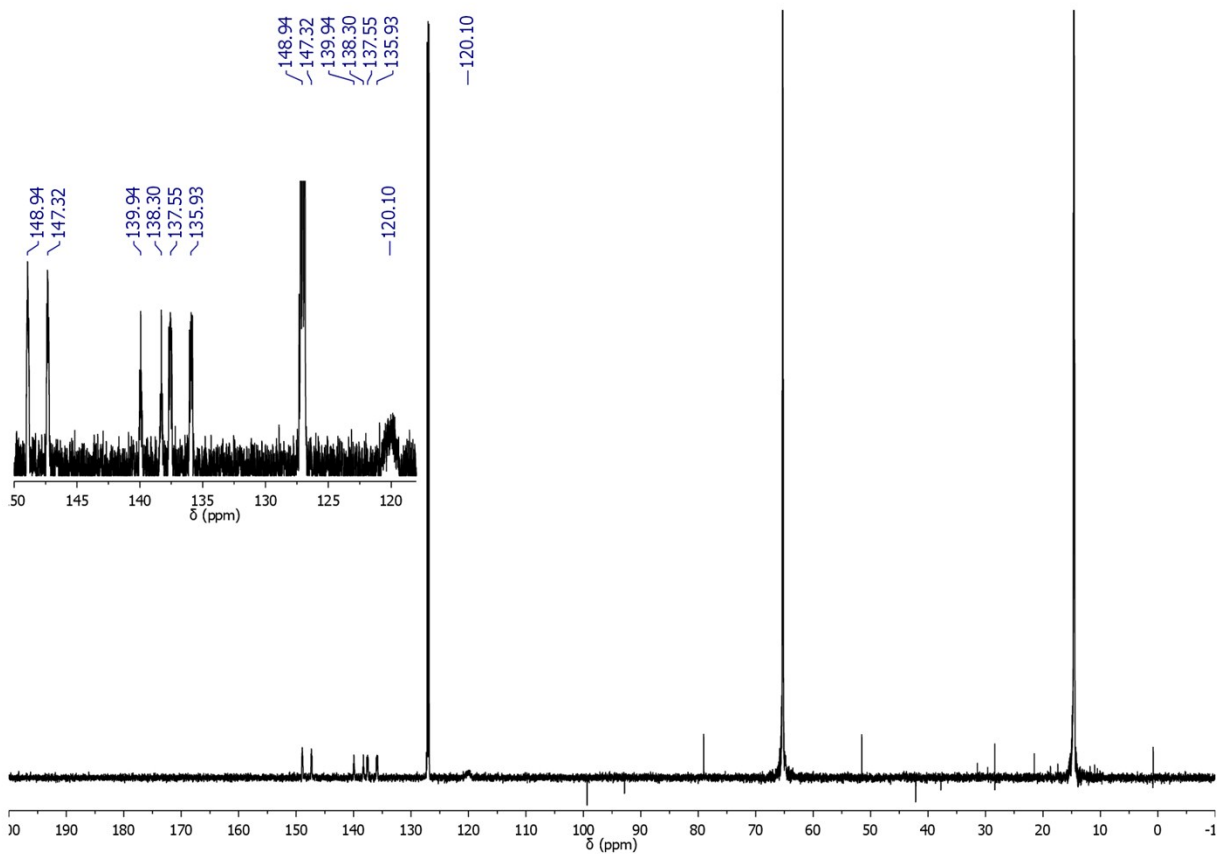

**Figure S2.** Room temperature  $^{13}\text{C}$  NMR spectrum of  $[(\text{C}_6\text{F}_5)_3\text{B}(\mu_3\text{-}\eta^1:\eta^1\text{-N}_3)\text{Na}(\text{OEt}_2)_2]_2$  (**3**) in  $(\text{CH}_3\text{CH}_2)_2\text{O}$ . The inset spectrum highlights the resonances attributable to **3**. In addition to the residual diethyl ether signals at  $\delta$  65.3 and 14.6, the signal at  $\delta$  = 127 ppm is from a sealed capillary of  $\text{C}_6\text{D}_6$  added to facilitate locking and shimming.

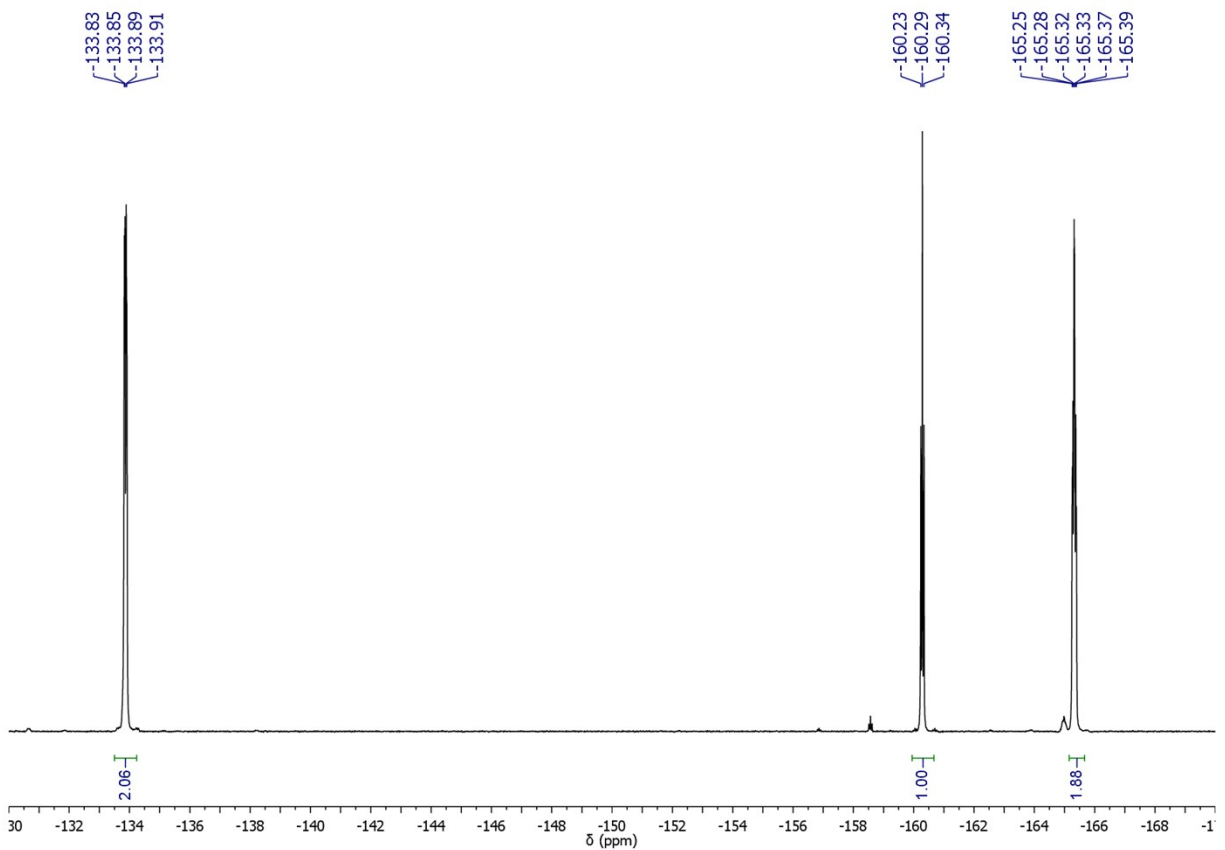

**Figure S3.** Room temperature  $^{19}\text{F}$  NMR spectrum of  $[(\text{C}_6\text{F}_5)_3\text{B}(\mu_3\text{-}\eta^1:\eta^1:\eta^1\text{-N}_3)\text{Na}(\text{OEt}_2)_2]_2$  (**3**) in  $(\text{CH}_3\text{CH}_2)_2\text{O}$ .

## X-ray Crystallography

In a dry nitrogen glovebox, samples of single crystals of **1**, **2**, and **3** were coated in Paratone-N oil prior to transport to diffraction facilities, where they were evaluated by polarized light microscopy and mounted on a Kaptan loop (for **1**) or on a MiTeGen 10  $\mu\text{m}$  aperture Dual-Thickness MicroMount (for **2** and **3**). X-ray diffraction data for **1** were collected at CheXray, Berkeley, CA, using a Bruker APEX II QUAZAR instrument outfitted with a monochromated Mo  $K\alpha$  radiation source ( $\lambda = 0.71073 \text{ \AA}$ ). X-ray diffraction data for **2** and **3** were collected at the Advanced Light Source (ALS), Lawrence Berkeley National Lab, Berkeley, CA, station 12.2.1 using a silicon monochromated beam of 17 keV ( $\lambda = 0.7288 \text{ \AA}$ ) synchrotron radiation. All data collections were conducted at 100 K, with the crystals cooled by a stream of dry nitrogen. Bruker APEX2 or APEX3 software was used for the data collections, Bruker SAINT V8.37A or V8.38A software was used to conduct the cell refinement and data reduction procedures,<sup>4</sup> and absorption corrections were carried out by a multi-scan method utilizing the SADABS program.<sup>5</sup> Initial structure solutions were found using direct methods (SHELXT),<sup>6</sup> and refinements were carried out using SHELXL-2014.<sup>7-9</sup> Thermal parameters for all non-hydrogen atoms were refined anisotropically. Thermal ellipsoid plots were made using Mercury.<sup>10</sup> Complex **1** possessed highly disordered outer sphere solvent molecules; the data for this structures were treated with the BYPASS routine included in the OLEX2 software package.<sup>11</sup> All structures have been deposited to the Cambridge Crystallographic Data Centre (CCDC), with deposition numbers 1984940 (**1**), 1984941 (**2**), and 1984942 (**3**).



**Table S1.** Selected distances (Å) and angles (°) for **1**.

| <b>1</b>                         |                   |
|----------------------------------|-------------------|
| U–N                              | 2.487(8)–2.526(8) |
| N–N                              | 1.159(8)–1.175(9) |
| U–N–N                            | 160.8(6)–177.0(7) |
| N–U–N                            | 91.6(2)–100.8(2)  |
| Cp(cent)–U <sup>a</sup>          | 2.511(4)–2.540(4) |
| Cp(cent)–U–Cp(cent) <sup>a</sup> | 137.8(1)          |

<sup>a</sup>One of the Cp rings was modeled over two positions; as the AFIX 56 command was used to fix both rings into a regular pentagon (the model was not stable upon refinement when this command was removed), metrics involving these Cp ring centroids were not included for either component.

**Table S2.** Selected distances (Å) and angles (°) for **2**.

| <b>2</b>            |                    |
|---------------------|--------------------|
| U(1)–N(1)           | 1.893(2)           |
| B(1)–N(1)           | 1.557(5)           |
| U(1)–F(1)           | 2.597(2)           |
| C(36)–F(1)          | 1.394(3)           |
| All other C–F       | 1.338(3)–1.354(4)  |
| U(1)–N(1)–B(1)      | 159.9(2)           |
| F(1)–U(1)–N(1)      | 69.19(8)           |
| Cp(cent)–U          | 2.511(1), 2.520(1) |
| Cp(cent)–U–Cp(cent) | 129.60(4)          |

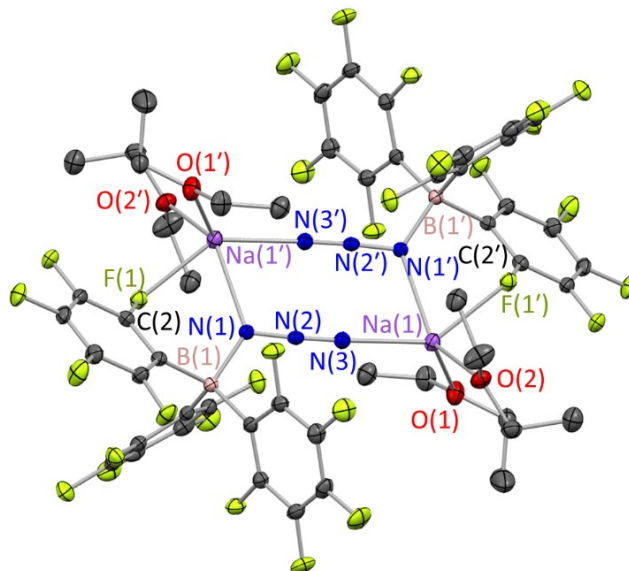

**Figure S5.** X-ray crystal structure of  $[(C_6F_5)_3B(\mu_3\text{-}\eta^1:\eta^1:\eta^1\text{-}N_3)Na(OEt_2)_2]_2$  (**3**) with 50% probability ellipsoids. Hydrogen atoms and positional disorder are omitted for clarity. Selected structural metrics are listed in Table S3.

**Table S3.** Selected distances (Å) and angles (°) for **3**.

| <b>3</b>          |                   |
|-------------------|-------------------|
| B(1)–N(1)         | 1.606(2)          |
| Na(1)–N(3)        | 2.425(1)          |
| Na(1)–N(1')       | 2.571(1)          |
| N(1)–N(2)         | 1.216(1)          |
| N(2)–N(3)         | 1.140(1)          |
| Na(1)–O(1)        | 2.311(1)          |
| Na(1)–O(2)        | 2.297(1)          |
| Na(1)–F(1')       | 2.3976(8)         |
| C(2)–F(1)         | 1.363(2)          |
| All other C–F     | 1.340(2)–1.354(2) |
| B(1)–N(1)–N(2)    | 117.9(1)          |
| Na(1)–N(3)–N(2)   | 160.7(1)          |
| Na(1)–N(1')–N(2') | 111.30(9)         |

**Table S4.** Crystallographic data for  $[(\text{Cp}^{\text{iPr}_4})_2\text{U}(\mu\text{-}\eta^1\text{:}\eta^1\text{-N}_3)]_4$  (**1**)

|                                         |                                                                                                                                  |
|-----------------------------------------|----------------------------------------------------------------------------------------------------------------------------------|
| Empirical formula                       | $\text{C}_{141}\text{H}_{244}\text{N}_{12}\text{U}_4$                                                                            |
| Formula weight                          | 3059.59                                                                                                                          |
| Color, habit                            | Green, block                                                                                                                     |
| Temperature                             | 100(2) K                                                                                                                         |
| Wavelength                              | 0.71073 Å                                                                                                                        |
| Crystal system                          | Tetragonal                                                                                                                       |
| Space group                             | $\text{P4}_2\text{2}_1\text{2}$                                                                                                  |
| Unit cell dimensions                    | $a = 20.7855(5)$ Å $\alpha = 90^\circ$ .<br>$b = 20.7855(5)$ Å $\beta = 90^\circ$ .<br>$c = 35.3744(10)$ Å $\gamma = 90^\circ$ . |
| Volume                                  | $15283.0(9)$ Å <sup>3</sup>                                                                                                      |
| Z / Z''                                 | 8 / 4                                                                                                                            |
| Density (calculated)                    | $1.330$ Mg/m <sup>3</sup>                                                                                                        |
| Absorption coefficient                  | $4.272$ mm <sup>-1</sup>                                                                                                         |
| F(000)                                  | 6168.0                                                                                                                           |
| Crystal size                            | $0.24 \times 0.20 \times 0.16$ mm <sup>3</sup>                                                                                   |
| Theta range for data collection         | $1.500$ to $25.379^\circ$                                                                                                        |
| Index ranges                            | $-24 \leq h \leq 25$ , $-25 \leq k \leq 24$ , $-42 \leq l \leq 39$                                                               |
| Reflections collected                   | 104285                                                                                                                           |
| Independent reflections                 | 14035 [ $R_{\text{int}} = 0.0690$ ]                                                                                              |
| Completeness to $\theta = 25.242^\circ$ | 99.9 %                                                                                                                           |
| Absorption correction                   | Semi-empirical from equivalents                                                                                                  |
| Max. and min. transmission              | 0.4901 and 0.3804                                                                                                                |
| Refinement method                       | Full-matrix least-squares on $F^2$                                                                                               |
| Data / restraints / parameters          | 14035 / 61 / 817                                                                                                                 |
| Goodness-of-fit on $F^2$                | 1.030                                                                                                                            |
| Final R indices [ $I > 2\sigma(I)$ ]    | $R_1 = 0.0356$ , $wR_2 = 0.0670$                                                                                                 |
| R indices (all data)                    | $R_1 = 0.0501$ , $wR_2 = 0.0712$                                                                                                 |
| Flack parameter                         | 0.029(9)                                                                                                                         |
| Largest diff. peak and hole             | 0.76 and $-0.60$ e $\cdot$ Å <sup>-3</sup>                                                                                       |

**Table S5.** Crystallographic data for  $(\text{Cp}^{\text{iPr}_4})_2\text{U}(\mu\text{-N})\text{B}(\text{C}_6\text{F}_5)_3$  (**2**)

|                                      |                                                                                                                                                        |
|--------------------------------------|--------------------------------------------------------------------------------------------------------------------------------------------------------|
| Empirical formula                    | $\text{C}_{55.5}\text{H}_{62}\text{BF}_{15}\text{NU}$                                                                                                  |
| Formula weight                       | 1276.90                                                                                                                                                |
| Color, habit                         | Orange, plate                                                                                                                                          |
| Temperature                          | 100(2) K                                                                                                                                               |
| Wavelength                           | 0.7288 Å                                                                                                                                               |
| Crystal system                       | Triclinic                                                                                                                                              |
| Space group                          | P-1                                                                                                                                                    |
| Unit cell dimensions                 | $a = 12.5562(5)$ Å $\alpha = 100.421(2)^\circ$ .<br>$b = 13.4735(6)$ Å $\beta = 97.392(2)^\circ$ .<br>$c = 18.1929(8)$ Å $\gamma = 116.686(2)^\circ$ . |
| Volume                               | $2626.3(2)$ Å <sup>3</sup>                                                                                                                             |
| Z                                    | 2                                                                                                                                                      |
| Density (calculated)                 | 1.615 Mg/m <sup>3</sup>                                                                                                                                |
| Absorption coefficient               | 1.516 mm <sup>-1</sup>                                                                                                                                 |
| F(000)                               | 1268.0                                                                                                                                                 |
| Crystal size                         | $0.150 \times 0.150 \times 0.020$ mm <sup>3</sup>                                                                                                      |
| Theta range for data collection      | 1.877 to 26.042°                                                                                                                                       |
| Index ranges                         | $-15 \leq h \leq 15, -16 \leq k \leq 16, -21 \leq l \leq 21$                                                                                           |
| Reflections collected                | 34714                                                                                                                                                  |
| Independent reflections              | 9599 [ $R_{\text{int}} = 0.0302$ ]                                                                                                                     |
| Completeness to theta = 25.930°      | 100.0 %                                                                                                                                                |
| Absorption correction                | Semi-empirical from equivalents                                                                                                                        |
| Max. and min. transmission           | 0.7462 and 0.5399                                                                                                                                      |
| Refinement method                    | Full-matrix least-squares on F <sup>2</sup>                                                                                                            |
| Data / restraints / parameters       | 9599 / 0 / 690                                                                                                                                         |
| Goodness-of-fit on F <sup>2</sup>    | 1.068                                                                                                                                                  |
| Final R indices [ $I > 2\sigma(I)$ ] | $R_1 = 0.0218, wR_2 = 0.0477$                                                                                                                          |
| R indices (all data)                 | $R_1 = 0.0244, wR_2 = 0.0488$                                                                                                                          |
| Largest diff. peak and hole          | 1.07 and $-1.09$ e <sup>-</sup> Å <sup>-3</sup>                                                                                                        |

**Table S6.** Crystallographic data for [(C<sub>6</sub>F<sub>5</sub>)<sub>3</sub>B(μ<sub>3</sub>-η<sup>1</sup>:η<sup>1</sup>:η<sup>1</sup>-N<sub>3</sub>)Na(OEt<sub>2</sub>)<sub>2</sub>]<sub>2</sub> (**3**)

|                                   |                                                                                                              |                   |
|-----------------------------------|--------------------------------------------------------------------------------------------------------------|-------------------|
| Empirical formula                 | C <sub>52</sub> H <sub>40</sub> B <sub>2</sub> F <sub>30</sub> N <sub>6</sub> Na <sub>2</sub> O <sub>4</sub> |                   |
| Formula weight                    | 1450.50                                                                                                      |                   |
| Color, habit                      | Colorless, block                                                                                             |                   |
| Temperature                       | 100(2) K                                                                                                     |                   |
| Wavelength                        | 0.7288 Å                                                                                                     |                   |
| Crystal system                    | Triclinic                                                                                                    |                   |
| Space group                       | P-1                                                                                                          |                   |
| Unit cell dimensions              | a = 11.1153(4) Å                                                                                             | α = 70.9380(10)°. |
|                                   | b = 11.7453(4) Å                                                                                             | β = 81.4520(10)°. |
|                                   | c = 12.4529(4) Å                                                                                             | γ = 72.2550(10)°. |
| Volume                            | 1461.32(9) Å <sup>3</sup>                                                                                    |                   |
| Z / Z''                           | 2 / 1                                                                                                        |                   |
| Density (calculated)              | 1.648 Mg/m <sup>3</sup>                                                                                      |                   |
| Absorption coefficient            | 0.191 mm <sup>-1</sup>                                                                                       |                   |
| F(000)                            | 728.0                                                                                                        |                   |
| Crystal size                      | 0.15 × 0.15 × 0.12 mm <sup>3</sup>                                                                           |                   |
| Theta range for data collection   | 1.976 to 27.097°                                                                                             |                   |
| Index ranges                      | -13 ≤ h ≤ 13, -14 ≤ k ≤ 14, -15 ≤ l ≤ 15                                                                     |                   |
| Reflections collected             | 20441                                                                                                        |                   |
| Independent reflections           | 5943 [R <sub>int</sub> = 0.0539]                                                                             |                   |
| Completeness to theta = 25.930°   | 99.4 %                                                                                                       |                   |
| Absorption correction             | Semi-empirical from equivalents                                                                              |                   |
| Max. and min. transmission        | 0.7462 and 0.6657                                                                                            |                   |
| Refinement method                 | Full-matrix least-squares on F <sup>2</sup>                                                                  |                   |
| Data / restraints / parameters    | 5943 / 1 / 451                                                                                               |                   |
| Goodness-of-fit on F <sup>2</sup> | 1.048                                                                                                        |                   |
| Final R indices [I > 2σ(I)]       | R <sub>1</sub> = 0.0331, wR <sub>2</sub> = 0.0855                                                            |                   |
| R indices (all data)              | R <sub>1</sub> = 0.0355, wR <sub>2</sub> = 0.0877                                                            |                   |
| Largest diff. peak and hole       | 0.34 and -0.33 e <sup>-</sup> Å <sup>-3</sup>                                                                |                   |

## **EPR Spectroscopy**

EPR spectroscopy was performed in the CalEPR center in the University of California, Davis. X-band continuous wave EPR spectra were recorded on the Bruker Biospin EleXsys E500 spectrometer with a super high Q resonator (ER4122SHQE). Cryogenic temperatures were achieved by using an ESR900 liquid helium cryostat with a temperature controller (Oxford Instrument ITC503). Spectrometer settings were: conversion time, 40 ms; modulation amplitude, 0.5 mT; modulation frequency, 100 kHz; and other settings as indicated in figure captions. Spectral simulations were performed in Matlab 2018a (MathWorks Inc.) with Easyspin 5.2.28 toolbox.<sup>12</sup>

## References

- (1) M. A. Boreen, D. J. Lussier, B. A. Skeel, T. D. Lohrey, F. A. Watt, D. K. Shuh, J. R. Long, S. Hohloch and J. Arnold, *Inorg. Chem.*, 2019, **58**, 16629.
- (2) T. A. Gazis, A. Dasgupta, M. S. Hill, J. M. Rawson, T. Wirth and R. L. Melen, *Dalton Trans.*, 2019, **48**, 12391
- (3) A. R. Fox and C. C. Cummins, *J. Am. Chem. Soc.*, 2009, **131**, 5716.
- (4) Bruker, APEX2, APEX3, and SAINT, Bruker AXS Inc., Madison, Wisconsin, USA.
- (5) Bruker, SADABS. Bruker AXS Inc., Madison, Wisconsin, USA.
- (6) G. M. Sheldrick, *Acta Cryst.*, 2015, **A71**, 3.
- (7) G. M. Sheldrick, *Acta Cryst.*, 2008, **A64**, 112.
- (8) O. V. Dolomanov, L. J. Bourhis, R. J. Gildea, J. A. K. Howard and H. Puschmann, *J. Appl. Cryst.*, 2009, **42**, 339.
- (9) L. J. Farrugia, *J. Appl. Cryst.*, 2012, **45**, 339.
- (10) C. F. Macrae, I. J. Bruno, J. A. Chisholm, P. R. Edgington, P. McCabe, E. Pidcock, L. Rodriguez-Monge, R. Taylor, J. van de Streek and P. A. Wood, *J. Appl. Cryst.*, 2008, **41**, 466.
- (11) P. van der Sluis and A. L. Spek, *Acta Cryst.*, 1990, **A46**, 194.
- (12) S. Stoll and A. Schweiger, *J. Magn. Reson.*, 2006, **178**, 42.
